# Supplementary material
Source: PubMed Central journal article supplement (PMC3995467)
Supplement: supp_M047514_jlr.M047514-1.pdf [file supp_M047514_jlr.M047514-1.pdf]

Fig. S1

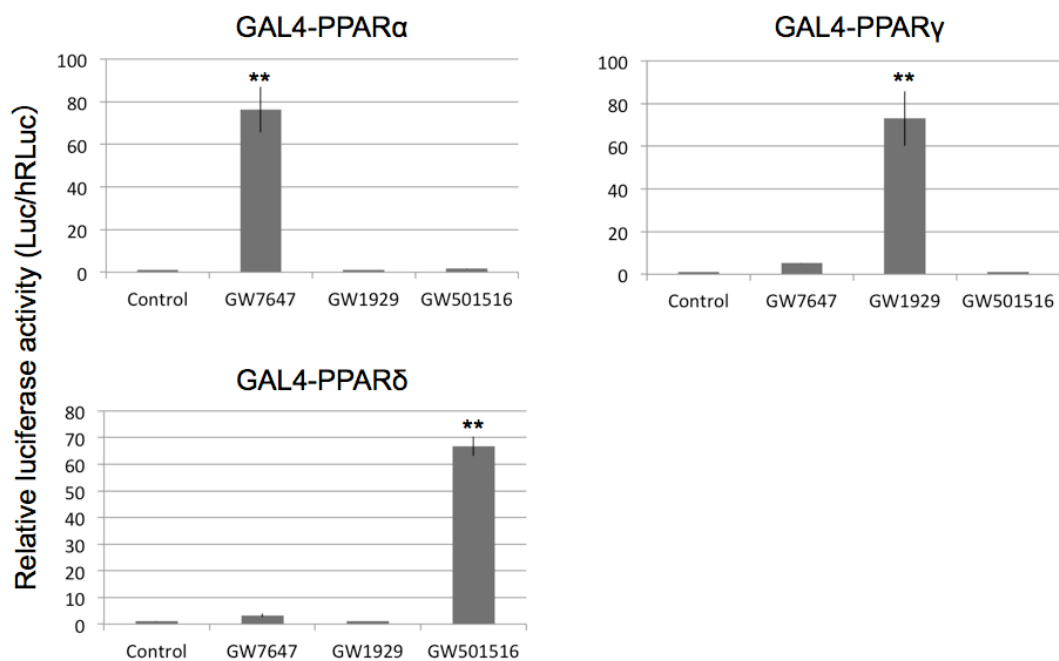

Fig. S1. GAL4-PPARs assays of PPAR agonists. GW7647 is a PPAR $\alpha$  agonist, GW1929 is a PPAR $\gamma$  agonist, and GW501516 is a PPAR $\delta$  agonist. NIH-3T3 cells were transfected with reporter plasmids and cultured with 1  $\mu$ M PPAR agonists for 24 hours. Then firefly luciferase (Luc) activities were measured, and the values were normalized against Renilla luciferase (hRLuc) activity. Plotted values represent the mean  $\pm$  SD from four independent cultures. Significant differences from the control are indicated by \*\*:  $p < 0.01$ .
