# Supplementary material
Source: PubMed Central journal article supplement (PMC3995467)
Supplement: supp_M047514_jlr.M047514-2.pdf [file supp_M047514_jlr.M047514-2.pdf]

Fig. S2

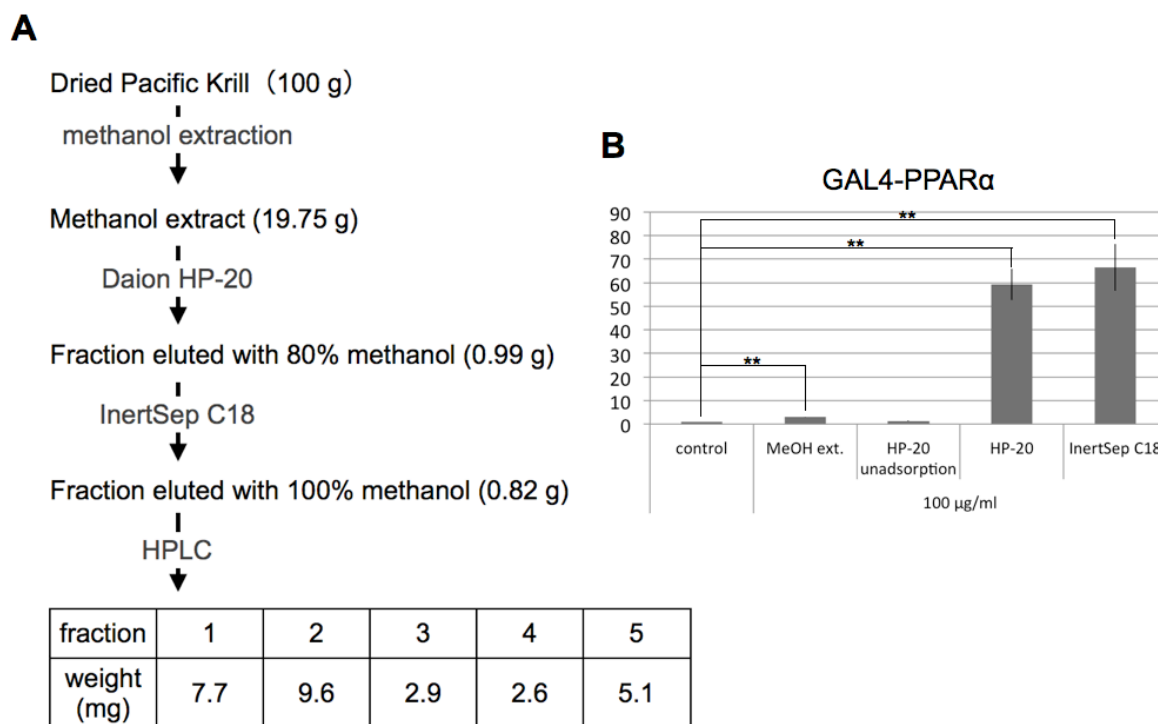

Fig. S2. Activity guided fractionation and GAL4-PPAR $\alpha$  assays. A. Outline of the activity guided fractionation method. B. GAL4-PPAR $\alpha$  assays of the fractions. NIH-3T3 cells were transfected with reporter plasmids and cultured with 100  $\mu$ g/ml of each fraction for 24 hours. Firefly luciferase (Luc) activities were measured at the end of the culture period, and the values were normalized against Renilla luciferase (hRLuc) activity. Plotted values represent the mean  $\pm$  SD from three independent cultures.
