# Supplementary material
Source: PubMed Central journal article supplement (PMC3995467)
Supplement: supp_M047514_jlr.M047514-3.pdf [file supp_M047514_jlr.M047514-3.pdf]

Fig. S3

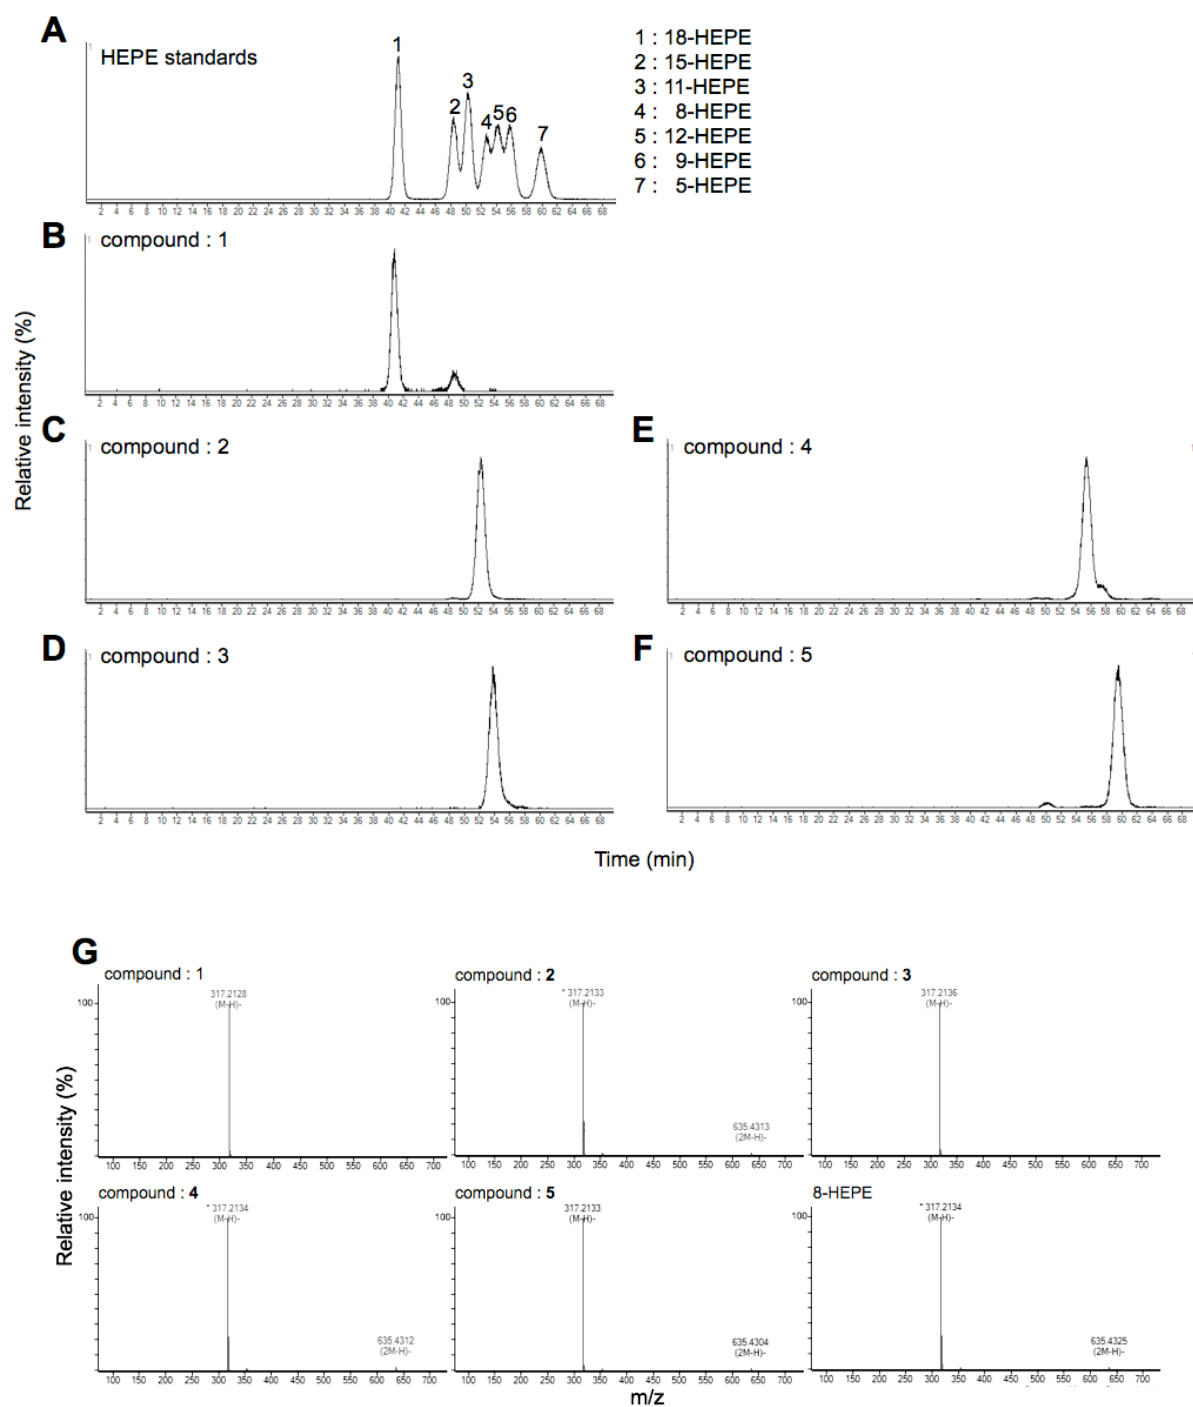

Fig. S3. LC-TOFMS analysis of the compounds purified from Pacific krill extracts and of HEPE standards. A-F. LC-TOFMS chromatograms. G. Mass spectrogram.
