# Supplementary material
Source: PubMed Central journal article supplement (PMC3995467)
Supplement: supp_M047514_jlr.M047514-4.pdf [file supp_M047514_jlr.M047514-4.pdf]

Fig. S4

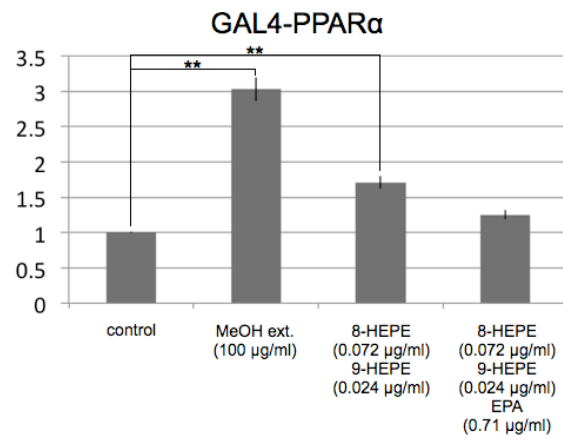

Fig. S4. GAL4-PPAR $\alpha$  assay. Analysis of the methanol extract from Pacific krill (100 mg/ml) showed that it contained 72  $\mu\text{g/ml}$  8-HEPE, 24  $\mu\text{g/ml}$  9-HEPE and 710  $\mu\text{g/ml}$  EPA. Cocktails containing the same concentrations of 8-HEPE and 9-HEPE, or 8-HEPE, 9-HEPE and EPA were prepared and used for GAL4-PPAR $\alpha$  assays. NIH-3T3 cells were transfected with reporter plasmids and cultured with either the methanol extract or each cocktail for 24 hours. Then firefly luciferase (Luc) activities were measured, and the values were normalized against Renilla luciferase (hRLuc) activity. Plotted values represent the mean  $\pm$  SD from three independent cultures.
