# Supplementary material
Source: PubMed Central journal article supplement (PMC3995467)
Supplement: supp_M047514_jlr.M047514-5.pdf [file supp_M047514_jlr.M047514-5.pdf]

Supplemental Table 1

| Symbol         | Organism          | Description                                           | Ref seq DNA ID | Real-time PCR primers     |
|----------------|-------------------|-------------------------------------------------------|----------------|---------------------------|
| <i>Actb</i>    | Rattus norvegicus | beta actin                                            | NM_031144      | GCAGGAGTACGATGAGTCCG      |
|                |                   |                                                       |                | ACGCAGCTCAGTAACAGTCC      |
| <i>Cyp4a1</i>  | Rattus norvegicus | Cytochrome P450, family 4, subfamily a, polypeptide 1 | NM_175837.     | CCAGCAGTCCCATCACCTC       |
|                |                   |                                                       |                | TGCTTCCCCAGAACCATCG       |
| <i>Fabp1</i>   | Rattus norvegicus | Fatty acid binding protein 1, liver                   | NM_012556      | GCAAGTACCAAGTGCAGAGC      |
|                |                   |                                                       |                | TCTGACACCCCTTGATGTC       |
| <i>Cpt1a</i>   | Rattus norvegicus | Carnitine palmitoyltransferase 1a, liver              | NM_031559      | CCTACCACGGCTGGATGTTT      |
|                |                   |                                                       |                | TACAACATGGGCTTCCGACC      |
| <i>Cpt2</i>    | Rattus norvegicus | Carnitine palmitoyltransferase 2                      | NM_012930      | ACCTCAATGCACAGAAGCCT      |
|                |                   |                                                       |                | TTCCCAACGCCAGTCTCAAA      |
| <i>Ehhadh</i>  | Rattus norvegicus | Enoyl-CoA, hydratase/3-hydrox yacyl CoA dehydrogenase | NM_133606      | TTGTGATCTGTGGCGCAAAC      |
|                |                   |                                                       |                | ATGCAAGGCCAGGGGTAAAA      |
| <i>Actb</i>    | Mus musculus      | beta actin                                            | NM_007393      | TGGAATCCTGTGGCATCCATGAAAC |
|                |                   |                                                       |                | TAAAACGCAGCTCAGTAACAGTCCG |
| <i>Fabp4</i>   | Mus musculus      | Fatty acid binding protein 4, adipocyte               | NM_024406      | GATGCCTTTGTGGGAACCT       |
|                |                   |                                                       |                | CTGTCGTCTGCGGTGATTT       |
| <i>Pparg</i>   | Mus musculus      | Peroxisome proliferator activated receptor gamma      | NM_0011273301  | TGCCTTCGCTGATGCACTGCC     |
|                |                   |                                                       |                | CACGGAGAGGTCCACAGAGCTGA   |
| <i>Angptl4</i> | Mus musculus      | Angiopietin-like 4                                    | NM_020581      | CTCCGTGGGGACCTTAACTG      |
|                |                   |                                                       |                | TTTTTACGCTCCTGCCGTTG      |
| <i>Rplp0</i>   | Mus musculus      | Ribosomal protein, large, P0                          | NM_007475      | TTTGGGCATCACCACGAAAA      |
|                |                   |                                                       |                | GGACACCCTCCAGAAAGCGA      |

Table S1. Primers for real-time PCR
