# Supplementary material
Source: PubMed Central journal article supplement (PMC3995467)
Supplement: supp_M047514_jlr.M047514-6.pdf [file supp_M047514_jlr.M047514-6.pdf]

Supplemental Table 2

| Fraction | Monoisotopic mass | Molecular formula                              | Retention time (min) | Name    | Purity (%) |
|----------|-------------------|------------------------------------------------|----------------------|---------|------------|
| 1        | 318.2201          | C <sub>20</sub> H <sub>30</sub> O <sub>3</sub> | 40.8                 | 18-HEPE | 85.3       |
| 2        | 318.2206          | C <sub>20</sub> H <sub>30</sub> O <sub>3</sub> | 52.3                 | 8-HEPE  | 89.3       |
| 3        | 318.2208          | C <sub>20</sub> H <sub>30</sub> O <sub>3</sub> | 53.8                 | 12-HEPE | 89.6       |
| 4        | 318.2207          | C <sub>20</sub> H <sub>30</sub> O <sub>3</sub> | 55.5                 | 9-HEPE  | 88.1       |
| 5        | 318.2204          | C <sub>20</sub> H <sub>30</sub> O <sub>3</sub> | 59.5                 | 5-HEPE  | 85.4       |

Table S2. LC-TOFMS analysis of the compounds purified from Pacific krill
