# Supplementary material
Source: PubMed Central journal article supplement (PMC3995467)
Supplement: supp_M047514_jlr.M047514-7.pdf [file supp_M047514_jlr.M047514-7.pdf]

Supplemental Table 3

| Compound | Retention Time<br>(min) |
|----------|-------------------------|
| 5-HEPE   | 59.5                    |
| 8-HEPE   | 52.4                    |
| 9-HEPE   | 55.6                    |
| 11-HEPE  | 50.1                    |
| 12-HEPE  | 54.0                    |
| 15-HEPE  | 48.1                    |
| 18-HEPE  | 40.6                    |

Table S3. LC-TOFMS analysis of HEPE standards
