# Supplementary material
Source: PubMed Central journal article supplement (PMC3995467)
Supplement: supp_M047514_jlr.M047514-8.pdf [file supp_M047514_jlr.M047514-8.pdf]

Supplemental Table 4

| Compound | $\mu\text{g} / \text{mg}$<br>(HEPE / methanol extract) | $\mu\text{g} / \text{mg}$<br>(HEPE / HP-20) | $\mu\text{g} / \text{mg}$<br>(HEPE / InertSep C18) |
|----------|--------------------------------------------------------|---------------------------------------------|----------------------------------------------------|
| 5-HEPE   | 0.56                                                   | 10.6                                        | 5.5                                                |
| 8-HEPE   | 0.72                                                   | 16.9                                        | 11.5                                               |
| 9-HEPE   | 0.24                                                   | 4.7                                         | 3.1                                                |
| 12-HEPE  | 0.16                                                   | 6.2                                         | 4.3                                                |
| 18-HEPE  | 0.40                                                   | 7.6                                         | 5.6                                                |
| EPA      | 7.1                                                    | 60.4                                        | 3.8                                                |

Table S4. Concentration of HEPEs and EPA in each fraction. The concentrations were measured by LC-TOFMS.
