# Supplementary material
Source: PubMed Central journal article supplement (PMC3995467)
Supplement: supp_M047514_jlr.M047514-9.pdf [file supp_M047514_jlr.M047514-9.pdf]

Supplemental Table 5

|                   | 8-HEPE     | EPA (free fatty acid) |
|-------------------|------------|-----------------------|
| Pacific krill     | 21.8 ± 8.8 | 157.9 ± 36.6          |
| Atlantic krill    | 11.4 ± 3.4 | 329.3 ± 81.5          |
| Japanese pilchard | 0.9 ± 0.2  | 10.9 ± 3.6            |
| Pacific saury     | 0.4 ± 0.4  | 14.3 ± 1.7            |

Table S5. Contents of 8-HEPE and EPA in Pacific krill, Atlantic krill, Japanese pilchard and Pacific saury. The values indicate 8-HEPE or EPA content (mg) in frozen samples (100 g). The values are mean ± SD (N = 3). Frozen samples were homogenized and then extracted with methanol (1:10 by weight per volume) under reflux for four hours. The supernatant was filtered and evaporated. Methanol extracts were dissolved with methanol (1 mg/ml). 8-HEPE and EPA concentration of these extracts were measured using with LC-TOFMS.
